# Supplementary material
Source: PubMed Central journal article supplement (PMC2906336)
Supplement: supp_M110.136168_jbc.M110.136168-1.pdf [file supp_M110.136168_jbc.M110.136168-1.pdf]

## **Supplementary Table Legend**

**Supplementary Table 1:** Differentially down regulated miRNAs in podocytes exposed to high glucose (25 mM) for 24 hrs.

**Supplementary Table 2:** Differentially down regulated miRNAs in cultured kidney microvascular endothelial cells exposed to high glucose (25 mM) for 24 hrs.

**Supplementary Table 3:** Differentially down regulated miRNAs in the glomeruli of db/db mice (20 weeks of age) compared to db/m mice.

**Supplementary Table 4:** Differentially down regulated miRNAs in all samples.

**Supplementary Table -1**

| Name            | p-value  | Mean<br>Group 1(0 hr) | Mean<br>Group 2 (24 hr) | Log2 (G2/G1) |
|-----------------|----------|-----------------------|-------------------------|--------------|
| mmu-miR-1192    | 3.64E-04 | 405                   | 78                      | -2.37        |
| mmu-miR-690     | 1.42E-05 | 2,081                 | 1,007                   | -1.05        |
| mmu-miR-674*    | 2.63E-03 | 238                   | 136                     | -0.81        |
| mmu-miR-877     | 9.37E-03 | 136                   | 80                      | -0.76        |
| mmu-miR-699     | 2.38E-02 | 160                   | 101                     | -0.66        |
| mmu-miR-324-5p  | 1.95E-02 | 116                   | 74                      | -0.66        |
| mmu-miR-98      | 3.73E-02 | 583                   | 381                     | -0.61        |
| mmu-miR-92a     | 1.23E-02 | 511                   | 338                     | -0.60        |
| mmu-miR-125a-5p | 2.49E-02 | 1,730                 | 1,183                   | -0.55        |
| mmu-miR-10a     | 4.67E-03 | 746                   | 513                     | -0.54        |
| mmu-miR-92b     | 1.80E-02 | 391                   | 270                     | -0.53        |
| mmu-miR-34c*    | 1.62E-02 | 492                   | 341                     | -0.53        |
| mmu-miR-744     | 2.52E-02 | 151                   | 105                     | -0.53        |
| mmu-miR-10b     | 8.99E-04 | 1,556                 | 1,092                   | -0.51        |
| mmu-miR-93      | 2.70E-03 | 831                   | 585                     | -0.50        |
| mmu-miR-30b     | 1.09E-02 | 706                   | 522                     | -0.44        |
| mmu-miR-22      | 1.07E-02 | 1,700                 | 1,276                   | -0.41        |
| mmu-miR-574-5p  | 2.56E-02 | 231                   | 175                     | -0.40        |
| mmu-miR-30e     | 3.49E-02 | 310                   | 238                     | -0.38        |
| mmu-miR-140*    | 2.50E-02 | 179                   | 144                     | -0.32        |
| mmu-miR-615-3p  | 3.44E-02 | 262                   | 211                     | -0.31        |
| mmu-miR-194     | 2.45E-02 | 209                   | 170                     | -0.30        |
| mmu-miR-191     | 2.71E-02 | 2,837                 | 2,337                   | -0.28        |
| mmu-miR-872     | 1.80E-02 | 197                   | 163                     | -0.28        |
| mmu-miR-185     | 3.48E-02 | 378                   | 313                     | -0.27        |

|             |          |       |       |       |
|-------------|----------|-------|-------|-------|
| mmu-miR-15b | 2.98E-02 | 852   | 712   | -0.26 |
| mmu-miR-702 | 2.53E-02 | 130   | 111   | -0.23 |
| mmu-miR-182 | 1.65E-02 | 694   | 599   | -0.21 |
| mmu-miR-805 | 2.76E-02 | 363   | 313   | -0.21 |
| mmu-miR-20b | 1.64E-02 | 168   | 147   | -0.19 |
| mmu-miR-674 | 7.64E-03 | 286   | 250   | -0.19 |
| mmu-miR-30c | 2.18E-02 | 2,181 | 1,942 | -0.17 |

**Supplementary Table -2**

| Name            | p-value  | Mean<br>Group 1(0hr) | Mean<br>Group 2 (24hr) | Log2(G2/G1) |
|-----------------|----------|----------------------|------------------------|-------------|
| mmu-miR-1192    | 6.37E-05 | 185                  | 44                     | -2.08       |
| mmu-miR-669h-3p | 2.15E-04 | 118                  | 28                     | -2.05       |
| mmu-miR-720     | 3.70E-09 | 339                  | 114                    | -1.58       |
| mmu-miR-222     | 2.41E-07 | 904                  | 316                    | -1.52       |
| mmu-miR-699     | 2.44E-05 | 132                  | 50                     | -1.39       |
| mmu-miR-140*    | 1.91E-07 | 268                  | 108                    | -1.31       |
| mmu-miR-34a     | 1.37E-07 | 326                  | 134                    | -1.28       |
| mmu-miR-18a     | 2.33E-06 | 632                  | 263                    | -1.26       |
| mmu-miR-674     | 8.82E-09 | 370                  | 161                    | -1.20       |
| mmu-miR-206     | 8.17E-07 | 253                  | 112                    | -1.18       |
| mmu-miR-1193    | 2.53E-03 | 171                  | 78                     | -1.11       |
| mmu-miR-34c     | 2.92E-03 | 210                  | 99                     | -1.08       |
| mmu-miR-214     | 1.34E-05 | 925                  | 441                    | -1.07       |
| mmu-miR-185     | 2.82E-06 | 435                  | 221                    | -0.98       |
| mmu-miR-674*    | 7.56E-06 | 208                  | 106                    | -0.97       |
| mmu-miR-17      | 8.02E-09 | 1,514                | 774                    | -0.97       |
| mmu-miR-491     | 1.15E-03 | 160                  | 84                     | -0.96       |
| mmu-miR-7a      | 1.74E-02 | 353                  | 182                    | -0.95       |
| mmu-miR-124     | 2.17E-02 | 199                  | 103                    | -0.95       |
| mmu-miR-20a     | 8.81E-05 | 1,928                | 1,011                  | -0.93       |
| mmu-miR-423-5p  | 3.67E-08 | 870                  | 463                    | -0.91       |
| mmu-miR-877     | 5.16E-04 | 169                  | 90                     | -0.90       |
| mmu-miR-93      | 2.08E-08 | 1,338                | 716                    | -0.90       |
| mmu-miR-155     | 1.55E-05 | 2,525                | 1,351                  | -0.90       |
| mmu-miR-320     | 9.24E-07 | 1,435                | 774                    | -0.89       |
| mmu-miR-351     | 6.78E-03 | 773                  | 418                    | -0.89       |
| mmu-miR-378*    | 2.97E-03 | 176                  | 93                     | -0.88       |
| mmu-miR-34c*    | 2.28E-05 | 222                  | 120                    | -0.88       |
| mmu-miR-323-3p  | 2.00E-02 | 290                  | 160                    | -0.88       |
| mmu-miR-31      | 1.01E-05 | 1,286                | 701                    | -0.87       |
| mmu-miR-412     | 3.36E-02 | 470                  | 250                    | -0.87       |
| mmu-miR-486     | 5.44E-04 | 178                  | 98                     | -0.87       |
| mmu-miR-17*     | 5.10E-04 | 158                  | 90                     | -0.81       |
| mmu-miR-379     | 3.15E-02 | 280                  | 160                    | -0.81       |
| mmu-miR-324-5p  | 2.80E-04 | 151                  | 87                     | -0.80       |
| mmu-miR-686     | 2.27E-03 | 320                  | 180                    | -0.80       |
| mmu-miR-103     | 7.08E-07 | 678                  | 390                    | -0.80       |
| mmu-miR-714     | 3.63E-04 | 171                  | 99                     | -0.80       |

|                 |          |       |       |       |
|-----------------|----------|-------|-------|-------|
| mmu-miR-425     | 2.74E-05 | 134   | 77    | -0.80 |
| mmu-miR-138     | 1.04E-03 | 390   | 231   | -0.79 |
| mmu-miR-92b     | 4.72E-06 | 1,460 | 845   | -0.79 |
| mmu-miR-449c    | 2.27E-02 | 332   | 189   | -0.79 |
| mmu-miR-302b*   | 2.42E-03 | 269   | 33    | -0.79 |
| mmu-miR-328     | 4.16E-05 | 184   | 106   | -0.78 |
| mmu-miR-338-5p  | 3.22E-03 | 299   | 178   | -0.77 |
| mmu-miR-151-3p  | 3.73E-05 | 554   | 326   | -0.76 |
| mmu-miR-92a     | 1.73E-06 | 2,663 | 1,580 | -0.75 |
| mmu-miR-532-5p  | 6.01E-05 | 213   | 131   | -0.70 |
| mmu-miR-805     | 8.00E-06 | 937   | 576   | -0.70 |
| mmu-miR-501-3p  | 2.62E-04 | 176   | 108   | -0.70 |
| mmu-miR-615-3p  | 7.96E-07 | 422   | 264   | -0.68 |
| mmu-miR-132     | 2.61E-02 | 154   | 98    | -0.66 |
| mmu-miR-29a     | 9.36E-05 | 5,422 | 3,488 | -0.64 |
| mmu-miR-188-5p  | 1.32E-02 | 450   | 281   | -0.63 |
| mmu-miR-34b-3p  | 8.71E-05 | 219   | 141   | -0.63 |
| mmu-miR-27b*    | 3.01E-05 | 188   | 123   | -0.61 |
| mmu-miR-692     | 3.70E-02 | 123   | 79    | -0.61 |
| mmu-miR-191     | 1.59E-05 | 1,009 | 663   | -0.61 |
| mmu-miR-107     | 1.89E-06 | 577   | 381   | -0.60 |
| mmu-miR-148a*   | 2.33E-02 | 320   | 206   | -0.60 |
| mmu-miR-143     | 3.58E-02 | 1,022 | 676   | -0.60 |
| mmu-miR-467a*   | 1.89E-02 | 389   | 267   | -0.57 |
| mmu-miR-151-5p  | 1.92E-02 | 1,207 | 815   | -0.57 |
| mmu-miR-128     | 3.13E-03 | 371   | 259   | -0.52 |
| mmu-miR-30c-2*  | 2.54E-04 | 114   | 81    | -0.50 |
| mmu-miR-145     | 2.83E-02 | 977   | 696   | -0.49 |
| mmu-miR-217     | 6.66E-03 | 120   | 79    | -0.49 |
| mmu-miR-125a-3p | 3.17E-02 | 156   | 112   | -0.48 |
| mmu-miR-744     | 7.91E-03 | 137   | 100   | -0.46 |
| mmu-miR-106b    | 7.48E-05 | 1,185 | 867   | -0.45 |
| mmu-miR-197     | 5.91E-03 | 110   | 79    | -0.45 |
| mmu-miR-1198    | 2.16E-02 | 191   | 140   | -0.45 |
| mmu-miR-689     | 8.20E-04 | 268   | 203   | -0.40 |
| mmu-miR-345-5p  | 8.96E-03 | 134   | 103   | -0.38 |
| mmu-miR-22      | 6.55E-04 | 366   | 287   | -0.35 |
| mmu-miR-361     | 2.49E-02 | 682   | 534   | -0.35 |
| mmu-miR-181a    | 4.21E-03 | 237   | 187   | -0.34 |
| mmu-miR-484     | 1.65E-04 | 217   | 172   | -0.33 |
| mmu-miR-702     | 4.05E-02 | 108   | 85    | -0.33 |
| mmu-miR-182     | 1.57E-03 | 810   | 643   | -0.33 |
| mmu-miR-221     | 7.70E-03 | 499   | 398   | -0.33 |
| mmu-miR-19b     | 2.13E-02 | 686   | 551   | -0.32 |

|             |          |       |       |       |
|-------------|----------|-------|-------|-------|
| mmu-miR-99b | 9.54E-03 | 1,901 | 1,532 | -0.31 |
| mmu-miR-183 | 8.67E-04 | 669   | 544   | -0.30 |
| mmu-miR-28  | 1.09E-03 | 321   | 262   | -0.29 |
| mmu-miR-24  | 4.25E-02 | 2,316 | 2,021 | -0.20 |

**Supplementary Table -3**

| Name           | p-value  | Mean                   |                          | Log2 (G2/G1) |
|----------------|----------|------------------------|--------------------------|--------------|
|                |          | Group 1( <i>db/m</i> ) | Group 2 ( <i>db/db</i> ) |              |
| mmu-miR-876-5p | 6.65E-03 | 120                    | 20                       | -2.59        |
| mmu-miR-343    | 6.37E-04 | 132                    | 25                       | -2.38        |
| mmu-miR-200c   | 4.62E-02 | 304                    | 97                       | -1.65        |
| mmu-miR-762    | 2.38E-03 | 468                    | 197                      | -1.25        |
| mmu-miR-99b    | 4.10E-02 | 757                    | 363                      | -1.06        |
| mmu-miR-92a    | 2.84E-03 | 283                    | 137                      | -1.04        |
| mmu-miR-320    | 2.68E-02 | 439                    | 217                      | -1.02        |
| mmu-miR-127    | 2.15E-03 | 130                    | 65                       | -0.97        |
| mmu-miR-25     | 1.07E-03 | 231                    | 123                      | -0.91        |
| mmu-miR-322*   | 6.65E-03 | 105                    | 60                       | -0.82        |
| mmu-miR-145    | 3.01E-02 | 5,601                  | 3,251                    | -0.78        |
| mmu-miR-214    | 2.20E-02 | 347                    | 202                      | -0.78        |
| mmu-miR-698    | 2.67E-02 | 141                    | 85                       | -0.76        |
| mmu-miR-361    | 2.51E-03 | 230                    | 138                      | -0.73        |
| mmu-miR-151-5p | 1.69E-02 | 888                    | 535                      | -0.73        |
| mmu-miR-92b    | 1.37E-02 | 341                    | 219                      | -0.65        |
| mmu-miR-140*   | 7.86E-03 | 260                    | 169                      | -0.62        |
| mmu-miR-24     | 3.05E-03 | 6,919                  | 4,540                    | -0.61        |
| mmu-miR-20a    | 1.44E-02 | 115                    | 78                       | -0.57        |
| mmu-miR-93     | 2.50E-03 | 147                    | 100                      | -0.55        |
| mmu-miR-10b    | 2.35E-02 | 297                    | 202                      | -0.55        |
| mmu-miR-195    | 1.70E-02 | 666                    | 465                      | -0.52        |
| mmu-miR-191    | 2.11E-02 | 990                    | 705                      | -0.49        |
| mmu-miR-17     | 1.69E-02 | 149                    | 106                      | -0.49        |

|                 |          |        |        |       |
|-----------------|----------|--------|--------|-------|
| mmu-miR-532-5p  | 1.64E-02 | 152    | 119    | -0.43 |
| mmu-miR-23b     | 9.90E-03 | 14,200 | 10,578 | -0.42 |
| mmu-miR-181a    | 1.07E-02 | 217    | 164    | -0.40 |
| mmu-miR-143     | 1.05E-02 | 4,793  | 3,626  | -0.40 |
| mmu-miR-151-3p  | 1.17E-02 | 429    | 331    | -0.36 |
| mmu-let-7e      | 2.95E-02 | 327    | 257    | -0.35 |
| mmu-miR-132     | 2.82E-02 | 174    | 134    | -0.35 |
| mmu-miR-497     | 2.19E-02 | 143    | 113    | -0.34 |
| mmu-let-7c      | 1.63E-02 | 3,033  | 2,421  | -0.33 |
| mmu-let-7b      | 1.79E-02 | 2,218  | 1,789  | -0.31 |
| mmu-let-7i      | 1.34E-02 | 1,137  | 924    | -0.30 |
| mmu-miR-378     | 1.55E-02 | 207    | 173    | -0.26 |
| mmu-miR-30d     | 1.73E-02 | 941    | 786    | -0.26 |
| mmu-miR-23a     | 2.19E-02 | 7,691  | 6,540  | -0.23 |
| mmu-miR-199a-3p | 1.12E-02 | 117    | 100    | -0.22 |
| mmu-miR-27b     | 1.69E-02 | 2,766  | 2,408  | -0.20 |
| mmu-miR-103     | 1.23E-02 | 731    | 667    | -0.13 |
| mmu-let-7d      | 2.76E-02 | 2,108  | 1,971  | -0.10 |
| mmu-miR-107     | 2.20E-02 | 662    | 619    | -0.10 |
| mmu-let-7a      | 3.04E-02 | 1,951  | 1,869  | -0.06 |
| mmu-miR-709     | 3.22E-02 | 10,971 | 10,640 | -0.04 |



**Supplementary Table -4**

|   |              |
|---|--------------|
| 1 | mmu-miR-92a  |
| 2 | mmu-miR-92b  |
| 3 | mmu-miR-93   |
| 4 | mmu-miR-191  |
| 5 | mmu-miR-140* |
